# Supplementary material
Source: publisher site journal article supplement (https://www.dovepress.com/article/580859)
Supplement: Supplementary file 1 [file 580859_Supplementary%20Files%2020Mar26.pdf]

Supplementary File 1: Biomarker levels in the cardiac and orthopaedic cohorts pre- and post-operatively.

|                        |                         | All Patients            |                             |                             |                           | Non-AKI Patients  |                             |                             |                           | AKI Patients      |                            |                            |                          |            |            |
|------------------------|-------------------------|-------------------------|-----------------------------|-----------------------------|---------------------------|-------------------|-----------------------------|-----------------------------|---------------------------|-------------------|----------------------------|----------------------------|--------------------------|------------|------------|
| Marker Type            | Biomarker               | Cardiac [mean±SD]       | Fracture [mean±SD]          | p value                     | Change                    | Cardiac [mean±SD] | Fracture [mean±SD]          | p value                     | Change                    | Cardiac [mean±SD] | Fracture [mean±SD]         | p value                    | Change                   |            |            |
| Preoperative           | Blood anti-inflammatory | sTNFR1 (Serum)          | 0.487 ± 0.759 (n=324)       | 0.799 ± 0.345 (n=174)       | <0.001                    | Fracture ↑        | 0.455 ± 0.821 (n=260)       | 0.719 ± 0.312 (n=119)       | <0.001                    | Fracture ↑        | 0.619 ± 0.395 (n=64)       | 0.972 ± 0.352 (n=55)       | <0.001                   | Fracture ↑ |            |
|                        | Blood anti-inflammatory | sTNFR2 (Serum)          | 0.517 ± 0.477 (n=324)       | 0.987 ± 0.797 (n=174)       | <0.001                    | Fracture ↑        | 0.448 ± 0.347 (n=260)       | 0.895 ± 0.777 (n=119)       | <0.001                    | Fracture ↑        | 0.798 ± 0.757 (n=64)       | 1.185 ± 0.810 (n=55)       | <0.001                   | Fracture ↑ |            |
|                        | Blood anti-inflammatory | IL-1Ra (Serum)          | 122.982 ± 225.601 (n=324)   | 347.906 ± 413.527 (n=175)   | <0.001                    | Fracture ↑        | 107.465 ± 186.869 (n=260)   | 352.060 ± 433.609 (n=120)   | <0.001                    | Fracture ↑        | 186.0180 ± 335.189 (n=64)  | 338.842 ± 369.539 (n=55)   | <0.001                   | Fracture ↑ |            |
|                        | Blood anti-inflammatory | IL-10 (Plasma)          | 1.810 ± 5.862 (n=318)       | 3.210 ± 7.634 (n=184)       | <0.001                    | Fracture ↑        | 1.645 ± 5.466 (n=254)       | 2.625 ± 4.696 (n=125)       | <0.001                    | Fracture ↑        | 2.466 ± 7.234 (n=64)       | 4.451 ± 11.595 (n=59)      | <0.001                   | Fracture ↑ |            |
|                        | Blood hypoperfusion     | H-FABP (Serum)          | 9.403 ± 34.507 (n=322)      | 14.656 ± 15.555 (n=183)     | <0.001                    | Fracture ↑        | 9.644 ± 38.364 (n=259)      | 12.700 ± 13.012 (n=125)     | <0.001                    | Fracture ↑        | 8.408 ± 6.257 (n=63)       | 18.872 ± 19.436 (n=58)     | <0.001                   | Fracture ↑ |            |
|                        | Blood hypoperfusion     | VEGF (Plasma)           | 35.299 ± 23.448 (n=318)     | 54.612 ± 48.520 (n=184)     | <0.001                    | Fracture ↑        | 33.216 ± 21.143 (n=254)     | 55.152 ± 53.677 (n=125)     | <0.001                    | Fracture ↑        | 43.570 ± 29.738 (n=64)     | 53.469 ± 35.581 (n=59)     | 0.029                    | Fracture ↑ |            |
|                        | Blood pro-inflammatory  | IL-6 (Plasma)           | 8.530 ± 41.424 (n=318)      | 76.471 ± 121.440 (n=184)    | <0.001                    | Fracture ↑        | 9.035 ± 46.145 (n=254)      | 77.165 ± 134.952 (n=125)    | <0.001                    | Fracture ↑        | 6.525 ± 8.840 (n=64)       | 75.001 ± 87.130 (n=59)     | 0.001                    | Fracture ↑ |            |
|                        | Blood pro-inflammatory  | IL-8 (Plasma)           | 4.387 ± 5.770 (n=318)       | 12.780 ± 36.708 (n=184)     | <0.001                    | Fracture ↑        | 4.234 ± 5.729 (n=254)       | 13.735 ± 42.301 (n=125)     | <0.001                    | Fracture ↑        | 4.998 ± 5.936 (n=64)       | 10.754 ± 20.489 (n=59)     | <0.001                   | Fracture ↑ |            |
|                        | Blood pro-inflammatory  | TNFα (Plasma)           | 2.731 ± 7.947 (n=318)       | 4.011 ± 6.090 (n=184)       | <0.001                    | Fracture ↑        | 2.729 ± 8.855 (n=254)       | 3.925 ± 7.085 (n=125)       | <0.001                    | Fracture ↑        | 2.741 ± 1.691 (n=64)       | 4.195 ± 3.108 (n=59)       | <0.001                   | Fracture ↑ |            |
|                        | Blood pro-inflammatory  | MCP-1 (Plasma)          | 137.407 ± 50.517 (n=318)    | 204.594 ± 124.028 (n=184)   | <0.001                    | Fracture ↑        | 133.985 ± 50.687 (n=254)    | 187.968 ± 89.065 (n=125)    | <0.001                    | Fracture ↑        | 150.984 ± 47.843 (n=64)    | 239.820 ± 172.391 (n=59)   | <0.001                   | Fracture ↑ |            |
|                        | Blood pro-inflammatory  | MIP-1α (Plasma)         | 6.315 ± 30.653 (n=315)      | 6.293 ± 6.312 (n=184)       | <0.001                    | Cardiac ↓         | 4.930 ± 17.302 (n=251)      | 5.473 ± 3.161 (n=125)       | <0.001                    | Fracture ↑        | 11.748 ± 58.801 (n=64)     | 8.032 ± 9.990 (n=59)       | <0.001                   | Cardiac ↓  |            |
|                        | Blood pro-inflammatory  | NGAL (Plasma)           | 658.558 ± 309.175 (n=319)   | 909.768 ± 441.739 (n=184)   | <0.001                    | Fracture ↑        | 631.144 ± 289.974 (n=255)   | 802.965 ± 421.030 (n=125)   | <0.001                    | Fracture ↑        | 767.785 ± 358.226 (n=64)   | 1136.045 ± 400.037 (n=59)  | <0.001                   | Fracture ↑ |            |
|                        | Blood pro-inflammatory  | IL-12p40 (Serum)        | 476.312 ± 255.968 (n=324)   | 436.884 ± 262.204 (n=175)   | 0.076                     | Cardiac ↓         | 444.303 ± 240.381 (n=260)   | 399.778 ± 249.068 (n=120)   | 0.059                     | Cardiac ↓         | 606.351 ± 277.416 (n=64)   | 517.844 ± 274.023 (n=55)   | 0.072                    | Cardiac ↓  |            |
|                        | Blood pro-inflammatory  | IP-10 (Serum)           | 144.508 ± 107.109 (n=324)   | 142.181 ± 117.243 (n=175)   | 0.335                     | Cardiac ↓         | 140.366 ± 110.830 (n=260)   | 138.983 ± 125.976 (n=120)   | 0.294                     | Cardiac ↓         | 161.335 ± 88.714 (n=64)    | 149.159 ± 96.162 (n=55)    | 0.312                    | Cardiac ↓  |            |
|                        | Blood pro-inflammatory  | sIL2Rα (Serum)          | 0.195 ± 0.223 (n=324)       | 0.260 ± 0.363 (n=174)       | <0.001                    | Fracture ↑        | 0.197 ± 0.242 (n=260)       | 0.261 ± 0.415 (n=119)       | 0.004                     | Fracture ↑        | 0.188 ± 0.119 (n=64)       | 0.259 ± 0.213 (n=55)       | 0.073                    | Fracture ↑ |            |
|                        | Blood pro-inflammatory  | IL-2 (Plasma)           | 1.120 ± 5.133 (n=318)       | 2.153 ± 10.008 (n=184)      | 0.785                     | Fracture ↑        | 1.021 ± 5.257 (n=254)       | 2.556 ± 11.318 (n=125)      | 0.225                     | Fracture ↑        | 1.513 ± 4.623 (n=64)       | 1.297 ± 6.408 (n=59)       | 0.143                    | Cardiac ↓  |            |
|                        | Blood pro-inflammatory  | IL-4 (Plasma)           | 0.467 ± 2.705 (n=318)       | 0.612 ± 2.229 (n=184)       | 0.563                     | Fracture ↑        | 0.486 ± 2.983 (n=254)       | 0.663 ± 2.605 (n=125)       | 0.874                     | Fracture ↑        | 0.391 ± 1.038 (n=64)       | 0.502 ± 1.070 (n=59)       | 0.313                    | Fracture ↑ |            |
|                        | Blood pro-inflammatory  | IL-1α (Plasma)          | 0.188 ± 0.480 (n=318)       | 0.557 ± 2.024 (n=184)       | 0.431                     | Fracture ↑        | 0.163 ± 0.438 (n=254)       | 0.640 ± 2.290 (n=125)       | 0.233                     | Fracture ↑        | 0.285 ± 0.614 (n=64)       | 0.381 ± 1.295 (n=59)       | 0.436                    | Fracture ↑ |            |
|                        | Blood pro-inflammatory  | IL-1β (Plasma)          | 0.776 ± 2.967 (n=318)       | 1.212 ± 4.884 (n=184)       | 0.721                     | Fracture ↑        | 0.744 ± 3.151 (n=254)       | 1.372 ± 5.477 (n=125)       | 0.746                     | Fracture ↑        | 0.902 ± 2.100 (n=64)       | 0.872 ± 3.312 (n=59)       | 0.640                    | Cardiac ↓  |            |
|                        | Blood pro-inflammatory  | IFNγ (Plasma)           | 0.543 ± 2.119 (n=318)       | 1.274 ± 5.447 (n=184)       | 0.827                     | Fracture ↑        | 0.405 ± 1.659 (n=254)       | 1.358 ± 5.812 (n=125)       | 0.476                     | Fracture ↑        | 1.090 ± 3.341 (n=64)       | 1.097 ± 4.622 (n=59)       | 0.312                    | Fracture ↑ |            |
|                        | Blood pro-inflammatory  | GM-CSF (Plasma)         | 1.551 ± 14.703 (n=315)      | 0.858 ± 1.752 (n=184)       | 0.407                     | Cardiac ↓         | 0.701 ± 0.619 (n=251)       | 0.748 ± 0.877 (n=125)       | 0.591                     | Fracture ↑        | 4.886 ± 32.584 (n=64)      | 1.090 ± 2.820 (n=59)       | 0.562                    | Cardiac ↓  |            |
|                        | Blood pro-inflammatory  | sIL6R (Serum)           | 1.834 ± 1.034 (n=324)       | 2.259 ± 1.664 (n=174)       | 0.007                     | Fracture ↑        | 1.776 ± 0.982 (n=260)       | 2.137 ± 1.300 (n=119)       | 0.017                     | Fracture ↑        | 2.071 ± 1.201 (n=64)       | 2.521 ± 2.251 (n=59)       | 0.441                    | Fracture ↑ |            |
|                        | Blood pro-inflammatory  | MMP9 (Serum)            | 18.352 ± 23.015 (n=324)     | 58.657 ± 56.136 (n=174)     | <0.001                    | Fracture ↑        | 19.214 ± 23.551 (n=260)     | 61.138 ± 60.581 (n=119)     | <0.001                    | Fracture ↑        | 14.850 ± 20.497 (n=64)     | 53.288 ± 45.090 (n=55)     | <0.001                   | Fracture ↑ |            |
|                        | Blood IRI               | Midkine (Serum)         | 1153.256 ± 1449.082 (n=269) | 2265.953 ± 2144.934 (n=128) | <0.001                    | Fracture ↑        | 1138.945 ± 1475.047 (n=211) | 2093.636 ± 2199.370 (n=86)  | <0.001                    | Fracture ↑        | 1205.318 ± 1361.408 (n=58) | 2618.793 ± 2008.198 (n=42) | <0.001                   | Fracture ↑ |            |
|                        | Urine IRI               | Midkine (Urine)         | 329.353 ± 651.104 (n=279)   | 1897.309 ± 2055.507 (n=141) | <0.001                    | Fracture ↑        | 302.916 ± 623.745 (n=221)   | 1598.460 ± 2057.991 (n=93)  | <0.001                    | Fracture ↑        | 430.085 ± 743.611 (n=58)   | 2476.329 ± 1945.028 (n=48) | <0.001                   | Fracture ↑ |            |
|                        | Urine anti-inflammatory | IL-1Ra (Urine)          | 2570.767 ± 4569.763 (n=310) | 4642.025 ± 6637.355 (n=162) | <0.001                    | Fracture ↑        | 2360.301 ± 4118.766 (n=246) | 5087.634 ± 7327.835 (n=110) | <0.001                    | Fracture ↑        | 3379.744 ± 5967.832 (n=64) | 3699.390 ± 4793.242 (n=52) | 0.263                    | Fracture ↑ |            |
|                        | Urine anti-inflammatory | sTNFR1 (Urine)          | 0.781 ± 0.841 (n=322)       | 3.142 ± 3.048 (n=171)       | <0.001                    | Fracture ↑        | 0.760 ± 0.859 (n=257)       | 3.034 ± 3.350 (n=119)       | <0.001                    | Fracture ↑        | 0.862 ± 0.766 (n=65)       | 3.391 ± 2.215 (n=52)       | <0.001                   | Fracture ↑ |            |
|                        | Urine anti-inflammatory | sTNFR2 (Urine)          | 1.322 ± 1.556 (n=322)       | 4.579 ± 3.781 (n=170)       | <0.001                    | Fracture ↑        | 1.258 ± 1.560 (n=257)       | 4.484 ± 4.090 (n=119)       | <0.001                    | Fracture ↑        | 1.574 ± 1.526 (n=65)       | 4.802 ± 2.962 (n=51)       | <0.001                   | Fracture ↑ |            |
|                        | Urine pro-inflammatory  | NGAL (Urine)            | 110.474 ± 183.431 (n=310)   | 324.152 ± 350.299 (n=162)   | <0.001                    | Fracture ↑        | 106.461 ± 182.443 (n=246)   | 318.949 ± 341.539 (n=110)   | <0.001                    | Fracture ↑        | 125.902 ± 187.834 (n=64)   | 335.157 ± 371.330 (n=52)   | <0.001                   | Fracture ↑ |            |
|                        | Urine pro-inflammatory  | IL-12p40 (Urine)        | 7.606 ± 45.919 (n=323)      | 6.271 ± 10.314 (n=171)      | <0.001                    | Cardiac ↓         | 4.991 ± 37.153 (n=258)      | 5.815 ± 8.400 (n=119)       | <0.001                    | Fracture ↑        | 17.885 ± 70.207 (n=65)     | 7.315 ± 13.776 (n=52)      | 0.008                    | Cardiac ↓  |            |
|                        | Urine pro-inflammatory  | IP-10 (Urine)           | 19.217 ± 47.639 (n=323)     | 50.332 ± 135.946 (n=170)    | <0.001                    | Fracture ↑        | 18.445 ± 47.779 (n=258)     | 61.395 ± 158.784 (n=119)    | <0.001                    | Fracture ↑        | 22.282 ± 47.320 (n=65)     | 24.519 ± 44.659 (n=51)     | 0.558                    | Fracture ↑ |            |
|                        | Urine pro-inflammatory  | sIL2Rα (Urine)          | 0.079 ± 0.069 (n=322)       | 0.097 ± 0.069 (n=170)       | <0.001                    | Fracture ↑        | 0.078 ± 0.070 (n=257)       | 0.102 ± 0.071 (n=118)       | 0.005                     | Fracture ↑        | 0.081 ± 0.064 (n=65)       | 0.086 ± 0.064 (n=52)       | 0.738                    | Fracture ↑ |            |
|                        | Urine pro-inflammatory  | sIL6R (Urine)           | 0.134 ± 0.171 (n=322)       | 0.133 ± 0.116 (n=171)       | 0.805                     | Cardiac ↓         | 0.122 ± 0.131 (n=257)       | 0.132 ± 0.118 (n=119)       | 0.622                     | Fracture ↑        | 0.180 ± 0.274 (n=65)       | 0.136 ± 0.111 (n=52)       | 0.566                    | Cardiac ↓  |            |
|                        | Urine pro-inflammatory  | MMP9 (Urine)            | 8.264 ± 51.839 (n=322)      | 18.043 ± 37.955 (n=170)     | <0.001                    | Fracture ↑        | 8.945 ± 57.797 (n=257)      | 21.052 ± 43.999 (n=119)     | <0.001                    | Fracture ↑        | 5.568 ± 10.356 (n=65)      | 11.021 ± 15.116 (n=51)     | <0.001                   | Fracture ↑ |            |
|                        | Postoperative           | Blood anti-inflammatory | sTNFR1 (Serum)              | 1.002 ± 2.483 (n=319)       | 1.077 ± 0.453 (n=147)     | <0.001            | Fracture ↑                  | 0.968 ± 2.770 (n=254)       | 0.942 ± 0.391 (n=101)     | <0.001            | Cardiac ↓                  | 1.137 ± 0.527 (n=65)       | 1.373 ± 0.444 (n=46)     | 0.002      | Fracture ↑ |
|                        |                         | Blood anti-inflammatory | sTNFR2 (Serum)              | 0.928 ± 0.589 (n=319)       | 1.330 ± 0.866 (n=147)     | <0.001            | Fracture ↑                  | 0.817 ± 0.492 (n=254)       | 1.127 ± 0.785 (n=101)     | <0.001            | Fracture ↑                 | 1.359 ± 0.728 (n=65)       | 1.774 ± 0.878 (n=46)     | 0.005      | Fracture ↑ |
|                        |                         | Blood anti-inflammatory | IL-1Ra (Serum)              | 667.057 ± 555.854 (n=319)   | 589.517 ± 491.079 (n=148) | 0.222             | Cardiac ↓                   | 583.482 ± 491.670 (n=254)   | 505.450 ± 425.127 (n=102) | 0.159             | Cardiac ↓                  | 993.643 ± 665.987 (n=65)   | 775.928 ± 574.978 (n=46) | 0.110      | Cardiac ↓  |
|                        |                         | Blood anti-inflammatory | IL-10 (Plasma)              | 5.849 ± 11.031 (n=324)      | 4.834 ± 17.601 (n=158)    | <0.001            | Cardiac ↓                   | 5.674 ± 11.409 (n=259)      | 3.781 ± 9.847 (n=106)     | 0.001             | Cardiac ↓                  | 6.549 ± 9.422 (n=65)       | 6.979 ± 27.332 (n=52)    | 0.001      | Fracture ↑ |
|                        |                         | Blood hypoperfusion     | H-FABP (Serum)              | 38.712 ± 54.220 (n=322)     | 32.278 ± 25.446 (n=156)   | 0.217             | Cardiac ↓                   | 32.305 ± 46.865 (n=257)     | 23.558 ± 16.980 (n=108)   | 0.998             | Cardiac ↓                  | 64.045 ± 71.716 (n=65)     | 51.897 ± 30.185 (n=48)   | 0.632      | Cardiac ↓  |
|                        |                         | Blood hypoperfusion     | VEGF (Plasma)               | 38.375 ± 20.097 (n=324)     | 57.621 ± 48.381 (n=158)   | <0.001            | Fracture ↑                  | 37.524 ± 19.138 (n=259)     | 59.830 ± 56.264 (n=106)   | <0.001            | Fracture ↑                 | 41.766 ± 23.392 (n=65)     | 53.117 ± 25.637 (n=52)   | 0.003      | Fracture ↑ |
|                        |                         | Blood pro-inflammatory  | IL-6 (Plasma)               | 159.290 ± 158.528 (n=324)   | 209.209 ± 194.147 (n=158) | 0.003             | Fracture ↑                  | 155.054 ± 163.091 (n=259)   | 175.485 ± 165.901 (n=106) | 0.175             | Fracture ↑                 | 176.169 ± 138.731 (n=65)   | 277.953 ± 228.448 (n=52) | 0.013      | Fracture ↑ |
|                        |                         | Blood pro-inflammatory  | IL-8 (Plasma)               | 18.343 ± 61.197 (n=324)     | 14.961 ± 46.868 (n=158)   | 0.081             | Cardiac ↓                   | 17.994 ± 67.044 (n=259)     | 16.366 ± 56.914 (n=106)   | 0.098             | Cardiac ↓                  | 19.734 ± 27.893 (n=65)     | 12.097 ± 8.975 (n=52)    | 0.110      | Cardiac ↓  |
|                        |                         | Blood pro-inflammatory  | TNFα (Plasma)               | 2.901 ± 3.318 (n=324)       | 5.350 ± 11.981 (n=158)    | <0.001            | Fracture ↑                  | 2.701 ± 3.399 (n=259)       | 5.602 ± 14.418 (n=106)    | <0.001            | Fracture ↑                 | 3.697 ± 2.860 (n=65)       | 4.835 ± 3.676 (n=52)     | 0.011      | Fracture ↑ |
|                        |                         | Blood pro-inflammatory  | MCP-1 (Plasma)              | 244.067 ± 157.937 (n=324)   | 231.135 ± 130.858 (n=158) | 0.790             | Cardiac ↓                   | 232.427 ± 157.298 (n=259)   | 212.962 ± 109.229 (n=106) | 0.576             | Cardiac ↓                  | 290.448 ± 153.010 (n=65)   | 268.180 ± 161.446 (n=52) | 0.352      | Cardiac ↓  |
|                        |                         | Blood pro-inflammatory  | MIP-1α (Plasma)             | 5.933 ± 4.421 (n=321)       | 6.605 ± 3.787 (n=158)     | 0.001             | Fracture ↑                  | 5.320 ± 3.276 (n=256)       | 6.036 ± 3.523 (n=106)     | 0.007             | Fracture ↑                 | 8.346 ± 6.895 (n=65)       | 7.765 ± 4.068 (n=52)     | 0.677      | Cardiac ↓  |
| Blood pro-inflammatory |                         | NGAL (Plasma)           | 1106.105 ± 524.315 (n=325)  | 936.200 ± 442.423 (n=158)   | 0.001                     | Cardiac ↓         | 1023.422 ± 488.285 (n=260)  | 786.655 ± 389.232 (n=106)   | <0.001                    | Cardiac ↓         | 1436.834 ± 536.640 (n=65)  | 1241.043 ± 386.548 (n=52)  | 0.029                    | Cardiac ↓  |            |
| Blood pro-inflammatory |                         | IL-12p40 (Serum)        | 353.553 ± 226.977 (n=319)   | 404.642 ± 242.732 (n=148)   | 0.014                     | Fracture ↑        | 320.403 ± 209.396 (n=254)   | 379.728 ± 241.892 (n=102)   | 0.021                     | Fracture ↑        | 483.092 ± 247.479 (n=65)   | 459.888 ± 237.941 (n=46)   | 0.726                    | Cardiac ↓  |            |
| Blood pro-inflammatory |                         | IP10 (Serum)            | 165.888 ± 189.710 (n=319)   | 155.056 ± 153.910 (n=148)   | 0.304                     | Cardiac ↓         | 160.697 ± 189.218 (n=254)   | 154.507 ± 156.851 (n=102)   | 0.278                     | Cardiac ↓         | 186.171 ± 191.740 (n=65)   | 156.275 ± 148.866 (n=46)   | 0.776                    | Cardiac ↓  |            |
| Blood pro-inflammatory |                         | sIL2Rα (Serum)          | 0.217 ± 0.199 (n=319)       | 0.272 ± 0.325 (n=147)       | 0.001                     | Fracture ↑        | 0.208 ± 0.211 (n=254)       | 0.260 ± 0.359 (n=101)       | 0.005                     | Fracture ↑        | 0.252 ± 0.143 (n=65)       | 0.300 ± 0.233 (n=46)       | 0.325                    | Fracture ↑ |            |

Supplementary File 2: Biomarker ratios comparisons between cardiac and orthopaedic surgery patients pre- and post-operative.

| Ratio type                                             | Ratio                                                | All Patients                    |                       |                       |                       | Non-AKI Patients      |                       |                      |                      | AKI Patients         |                      |                      |               |               |
|--------------------------------------------------------|------------------------------------------------------|---------------------------------|-----------------------|-----------------------|-----------------------|-----------------------|-----------------------|----------------------|----------------------|----------------------|----------------------|----------------------|---------------|---------------|
|                                                        |                                                      | Cardiac Ratio                   | Orthopaedic Ratio     | p-value               | Change                | Cardiac Ratio         | Orthopaedic Ratio     | p-value              | Change               | Cardiac Ratio        | Orthopaedic Ratio    | p-value              | Change        |               |
| Pre-operative                                          | sTNFR1 (Urine)/NGAL (Plasma)                         | 0.002 ± 0.008 (n=313)           | 0.004 ± 0.008 (n=163) | <0.001                | Orthopaedic ↑         | 0.002 ± 0.009 (n=249) | 0.004 ± 0.003 (n=112) | <0.001               | Orthopaedic ↑        | 0.001 ± 0.001 (n=64) | 0.003 ± 0.003 (n=31) | <0.001               | Orthopaedic ↑ |               |
|                                                        | sTNFR2 (Urine)/IL-12p40 (Serum)                      | 0.003 ± 0.008 (n=319)           | 0.011 ± 0.017 (n=157) | <0.001                | Orthopaedic ↑         | 0.003 ± 0.008 (n=255) | 0.012 ± 0.019 (n=109) | <0.001               | Orthopaedic ↑        | 0.003 ± 0.011 (n=64) | 0.009 ± 0.011 (n=48) | <0.001               | Orthopaedic ↑ |               |
|                                                        | sTNFR1 (Urine)/MCP-1 (Plasma)                        | 0.231 ± 0.24 (n=309)            | 0.629 ± 0.623 (n=163) | <0.001                | Orthopaedic ↑         | 0.227 ± 0.228 (n=245) | 0.63 ± 0.603 (n=112)  | <0.001               | Orthopaedic ↑        | 0.244 ± 0.296 (n=64) | 0.627 ± 0.532 (n=51) | <0.001               | Orthopaedic ↑ |               |
|                                                        | sTNFR1 (Urine)/TNFα (Plasma)                         | 0.359 ± 0.361 (n=312)           | 1.02 ± 0.905 (n=163)  | <0.001                | Orthopaedic ↑         | 0.36 ± 0.371 (n=248)  | 1.03 ± 0.975 (n=112)  | <0.001               | Orthopaedic ↑        | 0.359 ± 0.327 (n=64) | 0.988 ± 0.736 (n=51) | <0.001               | Orthopaedic ↑ |               |
|                                                        | sTNFR1 (Urine)/MCP-1 (Plasma)                        | 0.007 ± 0.009 (n=312)           | 0.018 ± 0.016 (n=163) | <0.001                | Orthopaedic ↑         | 0.007 ± 0.009 (n=248) | 0.017 ± 0.015 (n=112) | <0.001               | Orthopaedic ↑        | 0.006 ± 0.006 (n=64) | 0.019 ± 0.018 (n=51) | <0.001               | Orthopaedic ↑ |               |
|                                                        | sTNFR1 (Urine)/IL-6 (Plasma)                         | 0.331 ± 0.381 (n=312)           | 0.886 ± 0.109 (n=163) | <0.001                | Cardiac ↓             | 0.344 ± 0.399 (n=248) | 0.887 ± 0.111 (n=112) | <0.001               | Cardiac ↓            | 0.28 ± 0.299 (n=64)  | 0.883 ± 0.108 (n=51) | <0.001               | Cardiac ↓     |               |
|                                                        | sTNFR1 (Urine)/IP-10 (Serum)                         | 0.907 ± 0.039 (n=319)           | 0.021 ± 0.035 (n=157) | <0.001                | Orthopaedic ↑         | 0.907 ± 0.031 (n=255) | 0.023 ± 0.039 (n=109) | <0.001               | Orthopaedic ↑        | 0.907 ± 0.037 (n=64) | 0.03 ± 0.026 (n=48)  | <0.001               | Orthopaedic ↑ |               |
|                                                        | sTNFR1 (Urine)/IL-8 (Plasma)                         | 0.272 ± 0.299 (n=312)           | 0.519 ± 0.522 (n=163) | <0.001                | Orthopaedic ↑         | 0.272 ± 0.287 (n=248) | 0.517 ± 0.519 (n=112) | <0.001               | Orthopaedic ↑        | 0.275 ± 0.344 (n=64) | 0.525 ± 0.533 (n=51) | <0.001               | Orthopaedic ↑ |               |
|                                                        | sTNFR1 (Urine)/sIL2Rα (Serum)                        | 6.39 ± 10.4 (n=319)             | 18.8 ± 22 (n=157)     | <0.001                | Orthopaedic ↑         | 6.26 ± 9.68 (n=255)   | 18.3 ± 23 (n=109)     | <0.001               | Orthopaedic ↑        | 6.9 ± 12.6 (n=64)    | 19.9 ± 19.7 (n=48)   | <0.001               | Orthopaedic ↑ |               |
|                                                        | sTNFR2 (Urine)/NGAL (Plasma)                         | 0.003 ± 0.01 (n=313)            | 0.005 ± 0.004 (n=162) | <0.001                | Orthopaedic ↑         | 0.003 ± 0.012 (n=249) | 0.006 ± 0.004 (n=112) | <0.001               | Orthopaedic ↑        | 0.005 ± 0.004 (n=64) | 0.005 ± 0.004 (n=50) | <0.001               | Orthopaedic ↑ |               |
|                                                        | sTNFR2 (Urine)/IL-12p40 (Serum)                      | 0.004 ± 0.008 (n=319)           | 0.016 ± 0.026 (n=156) | <0.001                | Orthopaedic ↑         | 0.004 ± 0.008 (n=255) | 0.018 ± 0.029 (n=109) | <0.001               | Orthopaedic ↑        | 0.004 ± 0.007 (n=64) | 0.019 ± 0.015 (n=47) | <0.001               | Orthopaedic ↑ |               |
|                                                        | sTNFR2 (Urine)/MCP-1 (Plasma)                        | 0.389 ± 0.449 (n=309)           | 0.895 ± 0.719 (n=162) | <0.001                | Orthopaedic ↑         | 0.389 ± 0.407 (n=245) | 0.902 ± 0.719 (n=112) | <0.001               | Orthopaedic ↑        | 0.458 ± 0.581 (n=64) | 0.881 ± 0.734 (n=50) | <0.001               | Orthopaedic ↑ |               |
|                                                        | sTNFR2 (Urine)/TNFα (Plasma)                         | 0.585 ± 0.648 (n=312)           | 1.47 ± 1.16 (n=162)   | <0.001                | Orthopaedic ↑         | 0.57 ± 0.644 (n=248)  | 1.5 ± 1.26 (n=112)    | <0.001               | Orthopaedic ↑        | 0.643 ± 0.684 (n=64) | 1.38 ± 0.95 (n=50)   | <0.001               | Orthopaedic ↑ |               |
|                                                        | sTNFR2 (Urine)/MCP-1 (Plasma)                        | 0.011 ± 0.014 (n=312)           | 0.026 ± 0.022 (n=162) | <0.001                | Orthopaedic ↑         | 0.011 ± 0.015 (n=248) | 0.026 ± 0.021 (n=112) | <0.001               | Orthopaedic ↑        | 0.011 ± 0.013 (n=64) | 0.027 ± 0.023 (n=50) | <0.001               | Orthopaedic ↑ |               |
|                                                        | sTNFR2 (Urine)/IL-6 (Plasma)                         | 0.544 ± 0.693 (n=312)           | 0.132 ± 0.174 (n=162) | <0.001                | Cardiac ↓             | 0.546 ± 0.691 (n=248) | 0.138 ± 0.189 (n=112) | <0.001               | Cardiac ↓            | 0.511 ± 0.703 (n=64) | 0.118 ± 0.134 (n=50) | <0.001               | Cardiac ↓     |               |
|                                                        | sTNFR2 (Urine)/IP-10 (Serum)                         | 0.011 ± 0.014 (n=319)           | 0.044 ± 0.051 (n=156) | <0.001                | Orthopaedic ↑         | 0.011 ± 0.015 (n=255) | 0.046 ± 0.057 (n=109) | <0.001               | Orthopaedic ↑        | 0.012 ± 0.011 (n=64) | 0.04 ± 0.033 (n=47)  | <0.001               | Orthopaedic ↑ |               |
|                                                        | sTNFR2 (Urine)/IL-8 (Plasma)                         | 0.455 ± 0.564 (n=312)           | 0.75 ± 0.66 (n=162)   | <0.001                | Orthopaedic ↑         | 0.437 ± 0.518 (n=248) | 0.771 ± 0.677 (n=112) | <0.001               | Orthopaedic ↑        | 0.522 ± 0.716 (n=64) | 0.705 ± 0.627 (n=50) | 0.002                | Orthopaedic ↑ |               |
|                                                        | sTNFR2 (Urine)/sIL2Rα (Serum)                        | 10.5 ± 16.9 (n=319)             | 27.4 ± 31.5 (n=156)   | <0.001                | Orthopaedic ↑         | 9.93 ± 14.6 (n=255)   | 27.4 ± 34.2 (n=109)   | <0.001               | Orthopaedic ↑        | 12.5 ± 24 (n=64)     | 27.4 ± 24.5 (n=47)   | <0.001               | Orthopaedic ↑ |               |
|                                                        | IL-1Ra (Urine)/NGAL (Plasma)                         | 5.27 ± 13.3 (n=301)             | 5.48 ± 7.93 (n=152)   | 0.206                 | Orthopaedic ↑         | 5.27 ± 14.3 (n=238)   | 6.47 ± 8.95 (n=103)   | 0.023                | Orthopaedic ↑        | 5.27 ± 8.85 (n=63)   | 3.4 ± 4.56 (n=49)    | 0.511                | Cardiac ↓     |               |
|                                                        | IL-1Ra (Urine)/IL-12p40 (Serum)                      | 18.9 ± 202 (n=307)              | 21.5 ± 63.6 (n=147)   | <0.001                | Orthopaedic ↑         | 21.8 ± 227 (n=244)    | 27.3 ± 75.6 (n=101)   | <0.001               | Orthopaedic ↑        | 7.7 ± 14.4 (n=63)    | 8.58 ± 12.8 (n=46)   | 0.103                | Orthopaedic ↑ |               |
| IL-1Ra (Urine)/MCP-1 (Plasma)                          | 729 ± 1260 (n=297)                                   | 922 ± 1390 (n=152)              | 0.377                 | Orthopaedic ↑         | 710 ± 1260 (n=234)    | 1050 ± 1520 (n=103)   | 0.109                 | Orthopaedic ↑        | 800 ± 1260 (n=63)    | 652 ± 1010 (n=49)    | 0.565                | Cardiac ↓            |               |               |
| IL-1Ra (Urine)/TNFα (Plasma)                           | 1320 ± 2750 (n=301)                                  | 1800 ± 2700 (n=152)             | 0.453                 | Orthopaedic ↑         | 1220 ± 2420 (n=238)   | 1890 ± 3130 (n=103)   | 0.180                 | Orthopaedic ↑        | 1680 ± 3760 (n=63)   | 978 ± 1230 (n=49)    | 0.751                | Cardiac ↓            |               |               |
| IL-1Ra (Urine)/MCP-1 (Plasma)                          | 22.4 ± 32 (n=301)                                    | 25.4 ± 35 (n=152)               | 0.186                 | Orthopaedic ↑         | 21.9 ± 35 (n=238)     | 28.4 ± 39.7 (n=103)   | 0.044                 | Orthopaedic ↑        | 24.7 ± 45.6 (n=63)   | 17.2 ± 25.7 (n=49)   | 0.664                | Cardiac ↓            |               |               |
| IL-1Ra (Urine)/IL-6 (Plasma)                           | 1250 ± 2770 (n=301)                                  | 138 ± 286 (n=152)               | <0.001                | Cardiac ↓             | 1280 ± 2510 (n=238)   | 162 ± 332 (n=103)     | <0.001                | Cardiac ↓            | 1200 ± 3600 (n=63)   | 3.4 ± 4.56 (n=49)    | <0.001               | Cardiac ↓            |               |               |
| IL-1Ra (Urine)/IP-10 (Serum)                           | 28.4 ± 76.5 (n=307)                                  | 50.7 ± 128 (n=147)              | <0.001                | Orthopaedic ↑         | 28.9 ± 82.1 (n=244)   | 61.5 ± 152 (n=101)    | <0.001                | Orthopaedic ↑        | 26.3 ± 49.8 (n=63)   | 26.9 ± 36.3 (n=46)   | 0.172                | Orthopaedic ↑        |               |               |
| IL-1Ra (Urine)/IL-8 (Plasma)                           | 924 ± 1780 (n=301)                                   | 774 ± 1270 (n=152)              | 0.022                 | Cardiac ↓             | 851 ± 1430 (n=238)    | 926 ± 1490 (n=103)    | 0.194                 | Orthopaedic ↑        | 1200 ± 2710 (n=63)   | 456 ± 481 (n=49)     | 0.058                | Cardiac ↓            |               |               |
| IL-1Ra (Urine)/sIL2Rα (Serum)                          | 19400 ± 38500 (n=307)                                | 26300 ± 40200 (n=147)           | 0.071                 | Orthopaedic ↑         | 17800 ± 34100 (n=244) | 29500 ± 43600 (n=101) | 0.022                 | Orthopaedic ↑        | 25500 ± 52100 (n=63) | 19030 ± 30600 (n=46) | 0.871                | Cardiac ↓            |               |               |
| Urine anti-inflammatory / Blood anti-inflammatory (R2) | sTNFR1 (Urine)/sTNFR1 (Serum)                        | 2.1 ± 2.35 (n=319)              | 4.05 ± 3.02 (n=157)   | <0.001                | Orthopaedic ↑         | 2.23 ± 2.52 (n=255)   | 4.14 ± 2.98 (n=109)   | <0.001               | Orthopaedic ↑        | 1.6 ± 1.38 (n=64)    | 3.85 ± 3.13 (n=48)   | <0.001               | Orthopaedic ↑ |               |
|                                                        | sTNFR2 (Urine)/sTNFR2 (Serum)                        | 2.4 ± 3.32 (n=319)              | 5.84 ± 10.2 (n=157)   | <0.001                | Orthopaedic ↑         | 2.62 ± 3.65 (n=255)   | 6.29 ± 11.6 (n=109)   | <0.001               | Orthopaedic ↑        | 1.51 ± 1.31 (n=64)   | 4.82 ± 6.65 (n=48)   | <0.001               | Orthopaedic ↑ |               |
|                                                        | sTNFR1 (Urine)/sTNFR1 (Serum)                        | 3.44 ± 3.81 (n=319)             | 5.96 ± 4.3 (n=156)    | <0.001                | Orthopaedic ↑         | 3.56 ± 4.01 (n=255)   | 6.26 ± 4.44 (n=109)   | <0.001               | Orthopaedic ↑        | 2.96 ± 2.84 (n=64)   | 5.28 ± 3.89 (n=47)   | <0.001               | Orthopaedic ↑ |               |
|                                                        | sTNFR2 (Urine)/sTNFR2 (Serum)                        | 3.92 ± 6.38 (n=319)             | 8.65 ± 14.1 (n=156)   | <0.001                | Orthopaedic ↑         | 4.21 ± 6.88 (n=255)   | 9.51 ± 16 (n=109)     | <0.001               | Orthopaedic ↑        | 2.76 ± 2.68 (n=64)   | 6.64 ± 8.33 (n=47)   | <0.001               | Orthopaedic ↑ |               |
|                                                        | sTNFR1 (Urine)/sTNFR1 (Serum)                        | 7090 ± 12500 (n=307)            | 8160 ± 9280 (n=147)   | 0.122                 | Cardiac ↓             | 7070 ± 12500 (n=244)  | 7320 ± 10600 (n=101)  | 0.701                | Orthopaedic ↑        | 7170 ± 12700 (n=63)  | 3680 ± 4710 (n=46)   | 0.130                | Cardiac ↓     |               |
|                                                        | IL-1Ra (Urine)/sTNFR2 (Serum)                        | 8930 ± 15900 (n=307)            | 7100 ± 10700 (n=147)  | 0.411                 | Cardiac ↓             | 8940 ± 15200 (n=244)  | 8410 ± 12000 (n=101)  | 0.784                | Orthopaedic ↑        | 7880 ± 16800 (n=63)  | 4230 ± 6380 (n=46)   | 0.298                | Cardiac ↓     |               |
|                                                        | sTNFR2 (Urine)/H-FABP (Serum)                        | 0.154 ± 0.176 (n=316)           | 0.296 ± 0.274 (n=158) | <0.001                | Orthopaedic ↑         | 0.158 ± 0.182 (n=253) | 0.317 ± 0.29 (n=111)  | <0.001               | Orthopaedic ↑        | 0.14 ± 0.162 (n=63)  | 0.254 ± 0.228 (n=48) | <0.001               | Orthopaedic ↑ |               |
|                                                        | sTNFR2 (Urine)/VEGF (Plasma)                         | 0.027 ± 0.038 (n=312)           | 0.076 ± 0.088 (n=163) | <0.001                | Orthopaedic ↑         | 0.028 ± 0.039 (n=248) | 0.073 ± 0.087 (n=112) | <0.001               | Orthopaedic ↑        | 0.028 ± 0.026 (n=64) | 0.084 ± 0.09 (n=51)  | <0.001               | Orthopaedic ↑ |               |
|                                                        | sTNFR2 (Urine)/H-FABP (Serum)                        | 0.248 ± 0.286 (n=316)           | 0.437 ± 0.372 (n=162) | <0.001                | Orthopaedic ↑         | 0.245 ± 0.278 (n=253) | 0.474 ± 0.395 (n=111) | <0.001               | Orthopaedic ↑        | 0.261 ± 0.318 (n=63) | 0.349 ± 0.296 (n=47) | 0.007                | Orthopaedic ↑ |               |
|                                                        | sTNFR2 (Urine)/VEGF (Plasma)                         | 0.045 ± 0.063 (n=312)           | 0.108 ± 0.103 (n=163) | <0.001                | Orthopaedic ↑         | 0.045 ± 0.065 (n=248) | 0.105 ± 0.102 (n=112) | <0.001               | Orthopaedic ↑        | 0.047 ± 0.052 (n=64) | 0.114 ± 0.106 (n=50) | <0.001               | Orthopaedic ↑ |               |
|                                                        | IL-1Ra (Urine)/H-FABP (Serum)                        | 536 ± 1060 (n=304)              | 498 ± 855 (n=151)     | 0.103                 | Cardiac ↓             | 545 ± 1080 (n=242)    | 623 ± 991 (n=103)     | 0.956                | Orthopaedic ↑        | 504 ± 1000 (n=62)    | 230 ± 308 (n=48)     | 0.103                | Cardiac ↓     |               |
|                                                        | IL-1Ra (Urine)/VEGF (Plasma)                         | 89 ± 156 (n=301)                | 102 ± 160 (n=152)     | 0.432                 | Orthopaedic ↑         | 89.8 ± 152 (n=238)    | 115 ± 181 (n=103)     | 0.375                | Orthopaedic ↑        | 101 ± 172 (n=63)     | 75.2 ± 102 (n=49)    | 1.005                | Cardiac ↓     |               |
|                                                        | sTNFR1 (Urine)/Midkine (Serum)                       | 0.001 ± 0.002 (n=263)           | 0.003 ± 0.004 (n=114) | <0.001                | Orthopaedic ↑         | 0.002 ± 0.002 (n=205) | 0.004 ± 0.005 (n=78)  | <0.001               | Orthopaedic ↑        | 0.001 ± 0.001 (n=58) | 0.003 ± 0.003 (n=36) | 0.014                | Orthopaedic ↑ |               |
|                                                        | sTNFR2 (Urine)/Midkine (Serum)                       | 0.002 ± 0.003 (n=263)           | 0.004 ± 0.006 (n=114) | <0.001                | Orthopaedic ↑         | 0.002 ± 0.003 (n=205) | 0.005 ± 0.006 (n=78)  | <0.001               | Orthopaedic ↑        | 0.002 ± 0.002 (n=58) | 0.003 ± 0.004 (n=36) | 0.095                | Orthopaedic ↑ |               |
|                                                        | IL-1Ra (Urine)/Midkine (Serum)                       | 5.39 ± 11.9 (n=263)             | 4.23 ± 8.89 (n=112)   | 0.035                 | Cardiac ↓             | 5.72 ± 10.5 (n=205)   | 5.32 ± 10.6 (n=75)    | 0.468                | Cardiac ↓            | 4.31 ± 6.67 (n=58)   | 2.003 ± 2.65 (n=37)  | 0.016                | Cardiac ↓     |               |
|                                                        | Urine anti-inflammatory / Blood proinflammatory (R1) | sTNFR1 (Urine)/NGAL (Plasma)    | 0.008 ± 0.006 (n=315) | 0.007 ± 0.005 (n=147) | 0.036                 | Cardiac ↓             | 0.008 ± 0.005 (n=250) | 0.007 ± 0.005 (n=97) | 0.100                | Cardiac ↓            | 0.007 ± 0.006 (n=65) | 0.006 ± 0.003 (n=50) | 0.507         | Cardiac ↓     |
|                                                        |                                                      | sTNFR2 (Urine)/IL-12p40 (Serum) | 0.028 ± 0.023 (n=312) | 0.021 ± 0.025 (n=138) | <0.001                | Cardiac ↓             | 0.023 ± 0.024 (n=247) | 0.019 ± 0.023 (n=93) | <0.001               | Cardiac ↓            | 0.023 ± 0.024 (n=65) | 0.024 ± 0.029 (n=45) | 0.325         | Orthopaedic ↑ |
|                                                        |                                                      | sTNFR1 (Urine)/MCP-1 (Plasma)   | 1.58 ± 1.27 (n=311)   | 1.04 ± 0.89 (n=147)   | <0.001                | Cardiac ↓             | 1.63 ± 1.32 (n=246)   | 1 ± 0.812 (n=97)     | <0.001               | Cardiac ↓            | 1.39 ± 1.02 (n=65)   | 1.12 ± 1.03 (n=50)   | 0.021         | Cardiac ↓     |
|                                                        |                                                      | sTNFR1 (Urine)/TNFα (Plasma)    | 2.2 ± 2.05 (n=315)    | 3.58 ± 1.14 (n=147)   | <0.001                | Cardiac ↓             | 2.1 ± 2.04 (n=246)    | 3.58 ± 1.14 (n=97)   | <0.001               | Cardiac ↓            | 2.2 ± 2.04 (n=65)    | 3.7 ± 1.24 (n=45)    | <0.001        | Cardiac ↓     |
|                                                        |                                                      | sTNFR1 (Urine)/MCP-1 (Plasma)   | 0.036 ± 0.025 (n=315) | 0.028 ± 0.022 (n=147) | <0.001                | Cardiac ↓             | 0.037 ± 0.026 (n=250) | 0.027 ± 0.021 (n=97) | <0.001               | Cardiac ↓            | 0.034 ± 0.022 (n=65) | 0.031 ± 0.022 (n=50) | 0.258         | Cardiac ↓     |
| sTNFR1 (Urine)/IL-6 (Plasma)                           |                                                      | 0.087 ± 0.234 (n=315)           | 0.057 ± 0.101 (n=147) | <0.001                | Cardiac ↓             | 0.088 ± 0.257 (n=250) | 0.065 ± 0.12 (n=97)   | <0.001               | Cardiac ↓            | 0.084 ± 0.104 (n=65) | 0.042 ± 0.039 (n=50) | 0.001                | Cardiac ↓     |               |
| sTNFR1 (Urine)/IP-10 (Serum)                           |                                                      | 0.1 ± 0.209 (n=312)             | 0.054 ± 0.055 (n=138) | <0.001                | Cardiac ↓             | 0.107 ± 0.232 (n=247) | 0.051 ± 0.058 (n=93)  | <0.001               | Cardiac ↓            | 0.076 ± 0.109 (n=65) | 0.06 ± 0.049 (n=45)  | 0.185                | Cardiac ↓     |               |
| sTNFR1 (Urine)/IL-8 (Plasma)                           |                                                      | 0.833 ± 0.858 (n=315)           | 0.732 ± 0.67 (n=147)  | 0.026                 | Cardiac ↓             | 0.838 ± 0.852 (n=250) | 0.895 ± 0.65 (n=97)   | 0.011                | Cardiac ↓            | 0.81 ± 0.886 (n=65)  | 0.808 ± 0.708 (n=50) | 0.998                | Cardiac ↓     |               |
| sTNFR2 (Urine)/NGAL (Plasma)                           |                                                      | 0.009 ± 0.006 (n=316)           | 0.008 ± 0.005 (n=147) | 0.025                 | Cardiac ↓             | 0.01 ± 0.006 (n=251)  | 0.009 ± 0.006 (n=97)  | 0.205                | Cardiac ↓            | 0.009 ± 0.005 (n=65) | 0.006 ± 0.003 (n=50) | 0.253                | Cardiac ↓     |               |
| sTNFR2 (Urine)/IL-12p40 (Serum)                        |                                                      | 0.032 ± 0.023 (n=313)           | 0.023 ± 0.025 (n=138) | <0.001                | Cardiac ↓             | 0.034 ± 0.024 (n=248) | 0.023 ± 0.026 (n=93)  | <0.001               | Cardiac ↓            | 0.024 ± 0.017 (n=65) | 0.023 ± 0.022 (n=45) | 0.217                | Cardiac ↓     |               |
| sTNFR2 (Urine)/MCP-1 (Plasma)                          |                                                      | 1.88 ± 1.55 (n=312)             | 1.21 ± 1.01 (n=147)   | <0.001                | Cardiac ↓             | 1.96 ± 1.84 (n=247)   | 1.23 ± 1.02 (n=97)    | <0.001               | Cardiac ↓            | 1.64 ± 1.51 (n=65)   | 1.15 ± 1.02 (n=50)   |                      |               |               |

Supplementary File 3: Delta ( $\Delta$ ) differences in biomarkers measured pre- and post-operatively between cardiac and orthopaedic surgery patients.

| Marker Type             | Biomarker               | All Patients                                |                                              |                  |                        | Non-AKI Patients                            |                                              |                  |                        | AKI Patients                                |                                              |                  |                        |
|-------------------------|-------------------------|---------------------------------------------|----------------------------------------------|------------------|------------------------|---------------------------------------------|----------------------------------------------|------------------|------------------------|---------------------------------------------|----------------------------------------------|------------------|------------------------|
|                         |                         | Cardiac $\Delta$ Difference [mean $\pm$ SD] | Fracture $\Delta$ Difference [mean $\pm$ SD] | p value          | Change                 | Cardiac $\Delta$ Difference [mean $\pm$ SD] | Fracture $\Delta$ Difference [mean $\pm$ SD] | p value          | Change                 | Cardiac $\Delta$ Difference [mean $\pm$ SD] | Fracture $\Delta$ Difference [mean $\pm$ SD] | p value          | Change                 |
| Blood anti-inflammatory | sTNFR1 (Serum)          | 0.516 $\pm$ 1.776 (n=316)                   | 0.273 $\pm$ 0.352 (n=142)                    | <b>&lt;0.001</b> | Cardiac $\uparrow$     | 0.516 $\pm$ 1.973 (n=253)                   | 0.215 $\pm$ 0.339 (n=96)                     | <b>&lt;0.001</b> | Cardiac $\uparrow$     | 0.512 $\pm$ 0.437 (n=63)                    | 0.392 $\pm$ 0.352 (n=46)                     | 0.014            | Cardiac $\uparrow$     |
| Blood anti-inflammatory | sTNFR2 (Serum)          | 0.421 $\pm$ 0.470 (n=316)                   | 0.348 $\pm$ 0.578 (n=142)                    | 0.115            | Cardiac $\uparrow$     | 0.383 $\pm$ 0.376 (n=253)                   | 0.247 $\pm$ 0.612 (n=96)                     | 0.002            | Cardiac $\uparrow$     | 0.574 $\pm$ 0.720 (n=63)                    | 0.560 $\pm$ 0.433 (n=46)                     | 0.665            | Cardiac $\uparrow$     |
| Blood anti-inflammatory | IL-1Ra (Serum)          | 542.734 $\pm$ 537.269 (n=316)               | 259.122 $\pm$ 545.411 (n=143)                | <b>&lt;0.001</b> | Cardiac $\uparrow$     | 477.137 $\pm$ 476.183 (n=253)               | 156.814 $\pm$ 487.020 (n=97)                 | <b>&lt;0.001</b> | Cardiac $\uparrow$     | 806.165 $\pm$ 675.920 (n=63)                | 474.860 $\pm$ 602.123 (n=46)                 | 0.002            | Cardiac $\uparrow$     |
| Blood anti-inflammatory | IL-10 (Plasma)          | 4.162 $\pm$ 9.650 (n=314)                   | 1.951 $\pm$ 14.523 (n=152)                   | <b>&lt;0.001</b> | Cardiac $\uparrow$     | 4.154 $\pm$ 10.392 (n=251)                  | 1.019 $\pm$ 8.788 (n=101)                    | <b>&lt;0.001</b> | Cardiac $\uparrow$     | 4.192 $\pm$ 5.886 (n=63)                    | 3.795 $\pm$ 21.848 (n=51)                    | <b>&lt;0.001</b> | Cardiac $\uparrow$     |
| Blood hypoperfusion     | H-FABP (Serum)          | 29.770 $\pm$ 65.502 (n=314)                 | 18.577 $\pm$ 26.113 (n=149)                  | 0.090            | Cardiac $\uparrow$     | 22.932 $\pm$ 61.590 (n=252)                 | 12.080 $\pm$ 16.722 (n=101)                  | 0.004            | Cardiac $\uparrow$     | 57.564 $\pm$ 73.674 (n=62)                  | 32.248 $\pm$ 35.647 (n=48)                   | 0.236            | Cardiac $\uparrow$     |
| Blood hypoperfusion     | VEGF (Plasma)           | 3.077 $\pm$ 25.534 (n=314)                  | 1.082 $\pm$ 52.302 (n=152)                   | 0.394            | Cardiac $\uparrow$     | 4.370 $\pm$ 23.330 (n=251)                  | 2.020 $\pm$ 60.507 (n=101)                   | 0.446            | Cardiac $\uparrow$     | -2.075 $\pm$ 32.606 (n=63)                  | -0.776 $\pm$ 30.555 (n=51)                   | 0.423            | Orthopaedic $\uparrow$ |
| Blood pro-inflammatory  | IL-6 (Plasma)           | 152.283 $\pm$ 165.816 (n=314)               | 137.746 $\pm$ 211.842 (n=152)                | 0.026            | Cardiac $\uparrow$     | 147.584 $\pm$ 171.605 (n=251)               | 97.552 $\pm$ 198.525 (n=101)                 | <b>&lt;0.001</b> | Cardiac $\uparrow$     | 171.007 $\pm$ 140.057 (n=63)                | 217.347 $\pm$ 216.743 (n=51)                 | 0.596            | Orthopaedic $\uparrow$ |
| Blood pro-inflammatory  | IL-8 (Plasma)           | 14.256 $\pm$ 61.985 (n=314)                 | 4.846 $\pm$ 48.934 (n=152)                   | <b>&lt;0.001</b> | Cardiac $\uparrow$     | 14.072 $\pm$ 68.308 (n=251)                 | 5.335 $\pm$ 59.760 (n=101)                   | <b>&lt;0.001</b> | Cardiac $\uparrow$     | 14.990 $\pm$ 24.121 (n=63)                  | 3.876 $\pm$ 9.359 (n=51)                     | <b>&lt;0.001</b> | Cardiac $\uparrow$     |
| Blood pro-inflammatory  | TNF $\alpha$ (Plasma)   | 0.219 $\pm$ 7.112 (n=314)                   | 1.181 $\pm$ 10.803 (n=152)                   | 0.279            | Orthopaedic $\uparrow$ | 0.025 $\pm$ 7.854 (n=251)                   | 1.469 $\pm$ 13.186 (n=101)                   | 0.375            | Orthopaedic $\uparrow$ | 0.988 $\pm$ 2.430 (n=63)                    | 0.612 $\pm$ 2.051 (n=51)                     | 0.376            | Cardiac $\uparrow$     |
| Blood pro-inflammatory  | MCP-1 (Plasma)          | 108.568 $\pm$ 155.348 (n=314)               | 28.947 $\pm$ 111.519 (n=152)                 | <b>&lt;0.001</b> | Cardiac $\uparrow$     | 100.204 $\pm$ 156.135 (n=251)               | 26.376 $\pm$ 121.886 (n=101)                 | <b>&lt;0.001</b> | Cardiac $\uparrow$     | 141.891 $\pm$ 148.733 (n=63)                | 34.039 $\pm$ 88.353 (n=51)                   | <b>&lt;0.001</b> | Cardiac $\uparrow$     |
| Blood pro-inflammatory  | MIP-1 $\alpha$ (Plasma) | -0.347 $\pm$ 29.347 (n=310)                 | 0.579 $\pm$ 3.088 (n=152)                    | <b>&lt;0.001</b> | Orthopaedic $\uparrow$ | 0.451 $\pm$ 17.604 (n=247)                  | 0.528 $\pm$ 3.048 (n=101)                    | 0.001            | Orthopaedic $\uparrow$ | -3.477 $\pm$ 55.229 (n=63)                  | 0.679 $\pm$ 3.194 (n=51)                     | 0.001            | Orthopaedic $\uparrow$ |
| Blood pro-inflammatory  | NGAL (Plasma)           | 452.044 $\pm$ 420.025 (n=315)               | 44.540 $\pm$ 380.879 (n=152)                 | <b>&lt;0.001</b> | Cardiac $\uparrow$     | 398.994 $\pm$ 383.209 (n=252)               | 12.968 $\pm$ 389.872 (n=101)                 | <b>&lt;0.001</b> | Cardiac $\uparrow$     | 664.244 $\pm$ 491.721 (n=63)                | 107.064 $\pm$ 357.921 (n=51)                 | <b>&lt;0.001</b> | Cardiac $\uparrow$     |
| Blood pro-inflammatory  | IL-12p40 (Serum)        | -120.941 $\pm$ 185.884 (n=316)              | -35.119 $\pm$ 153.503 (n=143)                | <b>&lt;0.001</b> | Orthopaedic $\uparrow$ | -122.772 $\pm$ 171.729 (n=253)              | -24.240 $\pm$ 145.572 (n=97)                 | <b>&lt;0.001</b> | Orthopaedic $\uparrow$ | -113.589 $\pm$ 235.832 (n=63)               | -58.058 $\pm$ 168.387 (n=46)                 | 0.007            | Orthopaedic $\uparrow$ |
| Blood pro-inflammatory  | IP10 (Serum)            | 25.524 $\pm$ 176.165 (n=316)                | 13.617 $\pm$ 131.499 (n=143)                 | 0.181            | Cardiac $\uparrow$     | 24.741 $\pm$ 175.369 (n=253)                | 15.071 $\pm$ 117.958 (n=97)                  | 0.108            | Cardiac $\uparrow$     | 28.670 $\pm$ 180.720 (n=63)                 | 10.550 $\pm$ 157.696 (n=46)                  | 0.988            | Cardiac $\uparrow$     |
| Blood pro-inflammatory  | sIL2Ra (Serum)          | 0.021 $\pm$ 0.166 (n=316)                   | 0.033 $\pm$ 0.126 (n=142)                    | 0.143            | Orthopaedic $\uparrow$ | 0.012 $\pm$ 0.174 (n=253)                   | 0.021 $\pm$ 0.127 (n=96)                     | 0.246            | Orthopaedic $\uparrow$ | 0.058 $\pm$ 0.123 (n=63)                    | 0.058 $\pm$ 0.122 (n=46)                     | 0.980            | Orthopaedic $\uparrow$ |
| Blood pro-inflammatory  | IL-2 (Plasma)           | -0.157 $\pm$ 3.820 (n=314)                  | 0.021 $\pm$ 2.877 (n=152)                    | 0.847            | Orthopaedic $\uparrow$ | 0.004 $\pm$ 4.048 (n=251)                   | -0.028 $\pm$ 3.506 (n=101)                   | 0.176            | Cardiac $\uparrow$     | -0.802 $\pm$ 2.654 (n=63)                   | 0.117 $\pm$ 0.628 (n=51)                     | 0.011            | Orthopaedic $\uparrow$ |
| Blood pro-inflammatory  | IL-4 (Plasma)           | -0.106 $\pm$ 2.607 (n=314)                  | 0.032 $\pm$ 0.998 (n=152)                    | 0.583            | Orthopaedic $\uparrow$ | -0.136 $\pm$ 2.895 (n=251)                  | 0.025 $\pm$ 1.036 (n=101)                    | 0.262            | Orthopaedic $\uparrow$ | 0.010 $\pm$ 0.699 (n=63)                    | 0.047 $\pm$ 0.930 (n=51)                     | 0.637            | Orthopaedic $\uparrow$ |
| Blood pro-inflammatory  | IL-1 $\alpha$ (Plasma)  | 0.239 $\pm$ 3.640 (n=314)                   | 0.029 $\pm$ 0.521 (n=152)                    | 0.998            | Cardiac $\uparrow$     | 0.327 $\pm$ 4.061 (n=251)                   | 0.040 $\pm$ 0.612 (n=101)                    | 0.905            | Cardiac $\uparrow$     | -0.111 $\pm$ 0.498 (n=63)                   | 0.005 $\pm$ 0.265 (n=51)                     | 0.515            | Orthopaedic $\uparrow$ |
| Blood pro-inflammatory  | IL-1 $\beta$ (Plasma)   | 1.547 $\pm$ 29.416 (n=314)                  | 0.019 $\pm$ 1.240 (n=152)                    | 0.916            | Cardiac $\uparrow$     | 2.011 $\pm$ 32.885 (n=251)                  | 0.009 $\pm$ 1.425 (n=101)                    | 0.837            | Cardiac $\uparrow$     | -0.298 $\pm$ 1.878 (n=63)                   | 0.038 $\pm$ 0.764 (n=51)                     | 0.735            | Orthopaedic $\uparrow$ |
| Blood pro-inflammatory  | IFN $\gamma$ (Plasma)   | -0.184 $\pm$ 2.061 (n=314)                  | -0.150 $\pm$ 2.340 (n=152)                   | 0.859            | Orthopaedic $\uparrow$ | -0.105 $\pm$ 1.669 (n=251)                  | -0.261 $\pm$ 2.646 (n=101)                   | 0.997            | Cardiac $\uparrow$     | -0.500 $\pm$ 3.177 (n=63)                   | 0.070 $\pm$ 1.566 (n=51)                     | 0.681            | Orthopaedic $\uparrow$ |
| Blood pro-inflammatory  | GM-CSF (Plasma)         | -0.774 $\pm$ 13.265 (n=310)                 | 0.031 $\pm$ 1.107 (n=152)                    | 0.844            | Orthopaedic $\uparrow$ | -0.005 $\pm$ 0.440 (n=247)                  | -0.057 $\pm$ 0.549 (n=101)                   | 0.812            | Cardiac $\uparrow$     | -3.788 $\pm$ 29.404 (n=63)                  | 0.206 $\pm$ 1.747 (n=51)                     | 0.945            | Orthopaedic $\uparrow$ |
| Blood pro-inflammatory  | sIL6R (Serum)           | 0.121 $\pm$ 0.668 (n=316)                   | 0.041 $\pm$ 0.650 (n=142)                    | 0.005            | Cardiac $\uparrow$     | 0.133 $\pm$ 0.584 (n=253)                   | -0.043 $\pm$ 0.599 (n=96)                    | 0.001            | Cardiac $\uparrow$     | 0.076 $\pm$ 0.939 (n=63)                    | 0.217 $\pm$ 0.719 (n=46)                     | 0.883            | Orthopaedic $\uparrow$ |
| Blood pro-inflammatory  | MMP9 (Serum)            | 11.518 $\pm$ 33.046 (n=316)                 | 13.637 $\pm$ 71.064 (n=142)                  | 0.367            | Orthopaedic $\uparrow$ | 10.466 $\pm$ 32.365 (n=253)                 | 9.554 $\pm$ 75.449 (n=96)                    | 0.480            | Cardiac $\uparrow$     | 15.742 $\pm$ 35.610 (n=63)                  | 22.158 $\pm$ 60.798 (n=46)                   | 0.740            | Orthopaedic $\uparrow$ |
| Blood IRI               | Midkine (Serum)         | 705.269 $\pm$ 1665.164 (n=269)              | -130.205 $\pm$ 1923.366 (n=128)              | <b>&lt;0.001</b> | Cardiac $\uparrow$     | 487.056 $\pm$ 1430.710 (n=211)              | -203.931 $\pm$ 1765.125 (n=86)               | <b>&lt;0.001</b> | Cardiac $\uparrow$     | 1499.114 $\pm$ 2162.882 (n=58)              | 20.759 $\pm$ 2228.197 (n=42)                 | 0.001            | Cardiac $\uparrow$     |
| Urine IRI               | Midkine (Urine)         | 2254.982 $\pm$ 1619.421 (n=279)             | 893.048 $\pm$ 2067.282 (n=141)               | <b>&lt;0.001</b> | Cardiac $\uparrow$     | 2218.478 $\pm$ 1577.520 (n=221)             | 813.050 $\pm$ 1816.603 (n=93)                | <b>&lt;0.001</b> | Cardiac $\uparrow$     | 2394.073 $\pm$ 1777.833 (n=58)              | 1048.045 $\pm$ 2496.632 (n=48)               | 0.002            | Cardiac $\uparrow$     |
| Urine anti-inflammatory | IL-1Ra (Urine)          | 10224.628 $\pm$ 11362.783 (n=306)           | 2889.569 $\pm$ 10199.448 (n=143)             | <b>&lt;0.001</b> | Cardiac $\uparrow$     | 9628.131 $\pm$ 10717.319 (n=243)            | 1967.798 $\pm$ 9920.887 (n=96)               | <b>&lt;0.001</b> | Cardiac $\uparrow$     | 12525.405 $\pm$ 13418.280 (n=63)            | 4772.336 $\pm$ 10605.196 (n=47)              | <b>&lt;0.001</b> | Cardiac $\uparrow$     |
| Urine anti-inflammatory | sTNFR1 (Urine)          | 6.361 $\pm$ 3.830 (n=315)                   | 2.466 $\pm$ 3.203 (n=148)                    | <b>&lt;0.001</b> | Cardiac $\uparrow$     | 6.047 $\pm$ 3.522 (n=251)                   | 2.195 $\pm$ 3.174 (n=101)                    | <b>&lt;0.001</b> | Cardiac $\uparrow$     | 7.592 $\pm$ 4.684 (n=64)                    | 3.049 $\pm$ 3.219 (n=47)                     | <b>&lt;0.001</b> | Cardiac $\uparrow$     |
| Urine anti-inflammatory | sTNFR2 (Urine)          | 6.931 $\pm$ 3.744 (n=316)                   | 1.781 $\pm$ 3.455 (n=147)                    | <b>&lt;0.001</b> | Cardiac $\uparrow$     | 6.771 $\pm$ 3.589 (n=252)                   | 1.597 $\pm$ 3.533 (n=101)                    | <b>&lt;0.001</b> | Cardiac $\uparrow$     | 7.561 $\pm$ 4.273 (n=64)                    | 2.185 $\pm$ 3.280 (n=46)                     | <b>&lt;0.001</b> | Cardiac $\uparrow$     |
| Urine pro-inflammatory  | NGAL (Urine)            | 139.025 $\pm$ 254.597 (n=306)               | 159.101 $\pm$ 389.128 (n=143)                | 0.059            | Orthopaedic $\uparrow$ | 122.019 $\pm$ 225.255 (n=243)               | 106.863 $\pm$ 379.538 (n=96)                 | 0.280            | Cardiac $\uparrow$     | 204.622 $\pm$ 339.584 (n=63)                | 265.801 $\pm$ 390.651 (n=47)                 | 0.202            | Orthopaedic $\uparrow$ |
| Urine pro-inflammatory  | IL-12p40 (Urine)        | -1.719 $\pm$ 52.806 (n=317)                 | 2.260 $\pm$ 21.526 (n=148)                   | 0.249            | Orthopaedic $\uparrow$ | -0.780 $\pm$ 38.070 (n=253)                 | 2.382 $\pm$ 25.670 (n=101)                   | 0.238            | Orthopaedic $\uparrow$ | -5.434 $\pm$ 90.398 (n=64)                  | 1.996 $\pm$ 6.943 (n=47)                     | 0.549            | Orthopaedic $\uparrow$ |
| Urine pro-inflammatory  | IP-10 (Urine)           | 18.522 $\pm$ 102.550 (n=317)                | 55.500 $\pm$ 223.671 (n=147)                 | <b>&lt;0.001</b> | Orthopaedic $\uparrow$ | 11.523 $\pm$ 88.575 (n=253)                 | 54.839 $\pm$ 260.808 (n=101)                 | 0.011            | Orthopaedic $\uparrow$ | 46.191 $\pm$ 142.805 (n=64)                 | 56.953 $\pm$ 105.620 (n=46)                  | 0.092            | Orthopaedic $\uparrow$ |
| Urine pro-inflammatory  | sIL2Ra (Urine)          | -0.006 $\pm$ 0.074 (n=316)                  | 0.051 $\pm$ 0.313 (n=147)                    | <b>&lt;0.001</b> | Orthopaedic $\uparrow$ | -0.009 $\pm$ 0.073 (n=252)                  | 0.062 $\pm$ 0.376 (n=100)                    | 0.001            | Orthopaedic $\uparrow$ | 0.006 $\pm$ 0.078 (n=64)                    | 0.027 $\pm$ 0.073 (n=47)                     | 0.189            | Orthopaedic $\uparrow$ |
| Urine pro-inflammatory  | sIL6R (Urine)           | 0.033 $\pm$ 0.218 (n=316)                   | 0.047 $\pm$ 0.173 (n=148)                    | 0.936            | Orthopaedic $\uparrow$ | 0.036 $\pm$ 0.149 (n=252)                   | 0.052 $\pm$ 0.198 (n=101)                    | 0.576            | Orthopaedic $\uparrow$ | 0.019 $\pm$ 0.387 (n=64)                    | 0.038 $\pm$ 0.101 (n=47)                     | 0.418            | Orthopaedic $\uparrow$ |
| Urine pro-inflammatory  | MMP9 (Urine)            | -3.717 $\pm$ 50.996 (n=315)                 | -8.425 $\pm$ 40.275 (n=147)                  | <b>&lt;0.001</b> | Cardiac $\uparrow$     | -4.353 $\pm$ 56.789 (n=252)                 | -11.883 $\pm$ 46.894 (n=101)                 | <b>&lt;0.001</b> | Cardiac $\uparrow$     | -1.171 $\pm$ 10.309 (n=63)                  | -0.834 $\pm$ 17.037 (n=46)                   | 0.050            | Orthopaedic $\uparrow$ |

Delta ( $\Delta$ ) change was calculated as post-operative biomarker value minus pre-operative biomarker for each patient. Statistical significance was determined by Mann-Whitney U test with a Bonferroni corrected p value <0.0015 considered as significant (highlighted bold). Change arrow indicates whether  $\Delta$  change is higher in cardiac or orthopaedic cohorts. EGF, epidermal growth factor; GM-CSF, granulocyte monocyte-colony stimulating factor; H-FABP, heart-type fatty acid binding protein; IFN $\gamma$ , interferon gamma; IL-1 $\alpha$ , interleukin-1 alpha; IL-1 $\beta$ , interleukin-1 beta; IL-1Ra, interleukin-1 receptor antagonist; IL-2, interleukin-2; IL-4, interleukin-4; IL-5, interleukin-5; IL-6, interleukin-6; IL-8, interleukin-8; IL-10, interleukin-10; IL-12p40, interleukin-12 subunit p40; IL-15, interleukin-15; IP-10, interferon gamma-induced protein-10; IRI, ischaemia-reperfusion injury; MCP-1, monocyte chemoattractant protein-1; MIP-1 $\alpha$ , macrophage inflammatory protein-1 $\alpha$ ; n, number of patients; MMP9, matrix metalloproteinase-9; NGAL, neutrophil gelatinase-associated lipocalin; PDGF-BB, platelet-derived growth factor BB; SD, standard deviation; sIL2Ra, soluble interleukin-2 receptor alpha; sIL6R, soluble interleukin-6 receptor; sTNFR1, soluble tumour necrosis factor receptor 1; sTNFR2, soluble tumour necrosis factor receptor 2; TNF $\alpha$ , tumour necrosis factor alpha; VEGF, vascular endothelial growth factor.
